# Supplementary material for: Allelic Variants of HLA-C Upstream Region, PSORS1C3, MICA, TNFA and Genes Involved in Epidermal Homeostasis and Barrier Function Influence the Clinical Response to Anti-IL-12/IL-23 Treatment of Patients with Psoriasis
Source: MDPI journal article supplement (doi:10.3390/vaccines10111977), 2022-11-21
Supplement: s1 [file s1]

❖ Supplementary Files

Supplementary Table S1. List of the analyzed SNPs

| <b>Antigen presentation</b> |                 |                |                    |                 |            |
|-----------------------------|-----------------|----------------|--------------------|-----------------|------------|
| <b>Genome position</b>      | <b>Gene</b>     | <b>REF/ALT</b> | <b>SNP name</b>    | <b>dbSNP ID</b> | <b>MAF</b> |
| Chr5:96101822               | ERAP1           | C/T            | ERAP1_v7           | rs61733809      | 0.0037     |
| Chr5:96101907               | ERAP1           | C/T            | ERAP1_v8           | rs536860924     | 0.0004     |
| Chr5:96101944               | ERAP1           | A/G            | ERAP1_v1           | rs27524         | 0.6296     |
| Chr5:96101959               | ERAP1           | C/T            | ERAP1_v2           | rs27525         | 0.4532     |
| Chr5:96101993               | ERAP1           | C/T            | ERAP1_v9           | rs73138691      | 0.0085     |
| Chr5:96118811               | ERAP1           | G/A            | ERAP1_v10          | rs146423238     | 0.0046     |
| Chr5:96118852               | ERAP1           | G/C            | ERAP1_v3           | rs27044         | 0.7158     |
| Chr5:96118866               | ERAP1           | C/T            | ERAP1              | rs17482078      | 0.1837     |
| Chr5:96119028               | ERAP1           | G/A            | ERAP1_v11          | rs182760682     | 0.0029     |
| Chr5:96119044               | ERAP1           | T/A            | ERAP1_v12          | rs62364748      | 0.0781     |
| Chr5:96119055               | ERAP1           | T/C            | ERAP1_v13          | rs11738810      | 0.1061     |
| Chr5:96124296               | ERAP1           | C/G            | ERAP1_v14          | rs2278017       | 0.0007     |
| Chr5:96124330               | ERAP1           | T/C            | ERAP1_v4           | rs30187         | 0.6491     |
| Chr5:96124373               | ERAP1           | C/T            | ERAP1_v15          | rs78649652      | 0.0093     |
| Chr5:96124447               | ERAP1           | G/C            | ERAP1_v5           | rs30186         | 0.7886     |
| Chr5:96124453               | ERAP1           | A/G            | ERAP1_v6           | rs11743410      | 0.1245     |
| Chr5:96124534               | ERAP1           | G/A            | ERAP1_v16          | rs112124378     | 0.0017     |
| Chr5:96124687               | ERAP1           | A/G            | ERAP1_v17          | rs113202554     | 0.0038     |
| Chr5:96139034               | ERAP1           | C/T            | ERAP1_v18          | rs73148306      | 0.0277     |
| Chr5:96139061               | ERAP1           | G/A            | ERAP1_v19          | rs200264416     | 0.0031     |
| Chr5:96139066               | ERAP1           | C/T            | ERAP1_v20          | rs10062964      | 0.1724     |
| Chr5:96139250               | ERAP1           | C/G            | ERAP1_v21          | rs26653         | 0.2250     |
| Chr6:31155532               | PSORS1C3        | A/C            | PSORS1C3_v2        | rs28360057      | 0.1503     |
| Chr6:31155539               | PSORS1C3        | T/G            | PSORS1C3_v3        | rs4713443       | 0.3849     |
| Chr6:31155548               | PSORS1C3        | A/G            | PSORS1C3_v4        | rs4713444       | 0.4315     |
| Chr6:31155615               | PSORS1C3        | A/G            | PSORS1C3_v5        | rs28360058      | 0.1458     |
| Chr6:31155659               | PSORS1C3        | G/A            | PSORS1C3_v6        | rs9263845       | 0.1594     |
| Chr6:31155670               | PSORS1C3        | G/A            | PSORS1C3_v7        | rs9263846       | 0.1781     |
| Chr6:31155785               | PSORS1C3        | G/C            | <b>PSORS1C3_v1</b> | rs1265181       | 0.2115     |
| Chr6:31155790               | PSORS1C3 region | C/T            | PSORS1C3_v8        | rs116116256     | 0.0241     |
| Chr6:31155803               | PSORS1C3 region | C/T            | PSORS1C3_v9        | rs9405015       | 0.0155     |
| Chr6:31236622               | HLA-C           | C/A            | HLA-C_v1           | rs1130538       | 0.0000     |
| Chr6:31236639               | HLA-C           | G/C            | HLA-C_v2           | rs1071643       | 0.0364     |
| Chr6:31236643               | HLA-C           | T/C            | HLA-C_v3           | rs1130552       | 0.0170     |
| Chr6:31236668               | HLA-C           | T/C            | HLA-C_v4           | rs1130576       | 0.0274     |
| Chr6:31236679               | HLA-C           | T/C            | HLA-C_v5           | rs1130580       | 0.3358     |
| Chr6:31236690               | HLA-C           | T/G            | HLA-C_v6           | rs1130592       | 0.3189     |
| Chr6:31236722               | HLA-C           | C/T            | HLA-C_v7           | rs1094          | 0.3231     |
| Chr6:31236767               | HLA-C           | G/A            | HLA-C_v8           | rs1049579       | 0.0252     |
| Chr6:31236800               | HLA-C           | G/A            | HLA-C_v9           | rs116229144     | 0.0179     |
| Chr6:31236808               | HLA-C           | C/G            | HLA-C_v10          | rs1049650       | 0.0635     |
| Chr6:31236813               | HLA-C           | C/A            | HLA-C_v11          | rs1049663       | 0.0114     |
| Chr6:31236821               | HLA-C           | C/T            | HLA-C_v12          | rs1049668       | 0.0191     |
| Chr6:31236836               | HLA-C           | A/G            | HLA-C_v13          | rs41289069      | 0.0239     |
| Chr6:31236853               | HLA-C           | GT/AT          | HLA-C_v14          | rs1065711       | 0.1314     |
| Chr6:31236853               | HLA-C           | GT/AC          | HLA-C_v15          | rs386698953     | MNV        |

|               |              |     |                                   |             |         |
|---------------|--------------|-----|-----------------------------------|-------------|---------|
| Chr6:31239108 | HLA-C        | T/A | HLA-Cw6                           | rs1131118   | 0.3143  |
| Chr6:31239506 | HLA-C        | C/G | HLA-C exon2                       | rs1050414   | 0.1201  |
| Chr6:31239518 | HLA-C        | C/T | HLA-C_v16                         | rs1050420   | 0.0000  |
| Chr6:31239543 | HLA-C        | C/T | HLA-C_v17                         | rs1050428   | 0.0996  |
| Chr6:31239577 | HLA-C        | A/C | HLA-C_v18                         | rs707911    | 0.0000  |
| Chr6:31239585 | HLA-C        | C/T | HLA-C_v19                         | rs1050437   | 0.1729  |
| Chr6:31239593 | HLA-C        | T/C | HLA-C_v20                         | rs41542719  | 0.2407  |
| Chr6:31239601 | HLA-C        | C/T | HLA-C_v21                         | rs281860337 | 0.0000  |
| Chr6:31239614 | HLA-C        | G/A | HLA-C_v22                         | rs1050444   | 0.1573  |
| Chr6:31239616 | HLA-C        | C/T | HLA-C_v23                         | rs1050445   | 0.1142  |
| Chr6:31241077 | HLA-C region | T/C | HLA-C_promoter_v4                 | rs35976302  | 0.1272  |
| Chr6:31241092 | HLA-C region | C/G | HLA-C_promoter_v5                 | rs2523599   | 0.3645  |
| Chr6:31241109 | HLA-C region | C/T | HLA-C_promoter1                   | rs13191343  | 0.1394  |
| Chr6:31241116 | HLA-C region | C/T | HLA-C_promoter_v6                 | rs28367582  | 0.0414  |
| Chr6:31241127 | HLA-C region | T/C | HLA-C_promoter2                   | rs13207315  | 0.1429  |
| Chr6:31241182 | HLA-C region | C/T | HLA-C_promoter3                   | rs6900444   | 0.4937  |
| Chr6:31241207 | HLA-C region | C/T | HLA-C_promoter_v7                 | rs6900458   | 0.2140  |
| Chr6:31241215 | HLA-C region | A/G | HLA-C_promoter_v8                 | rs58019823  | 0.1239  |
| Chr6:31241241 | HLA-C region | C/T | HLA-C_promoter_v9                 | rs114183633 | 0.0272  |
| Chr6:31241260 | HLA-C region | T/C | HLA-C_promoter_v9                 | rs2524088   | 0.0000  |
| Chr6:31241270 | HLA-C region | G/A | HLA-C_promoter_v10                | rs6900323   | 0.2205  |
| Chr6:31241294 | HLA-C region | C/G | HLA-C_promoter_v11                | rs2524087   | 0.0413  |
| Chr6:31241311 | HLA-C region | A/G | HLA-C_promoter_v12                | rs2524086   | 0.1476  |
| Chr6:31241353 | HLA-C region | G/T | HLA-C_promoter_v13                | rs34090104  | 0.0642  |
| Chr6:31241370 | HLA-C region | C/T | HLA-C_promoter_v14                | rs6923313   | 0.3589  |
| Chr6:31251829 | HLA-C region | A/T | HLA-C                             | rs764918802 | 0.0003  |
| Chr6:31251895 | HLA-C region | A/G | HLA-C                             | rs2524057   | 0.0862  |
| Chr6:31251924 | HLA-C region | C/T | <b>HLA-Cw6_LD1</b>                | rs12189871  | 0.0904  |
| Chr6:31251937 | HLA-C region | C/T | HLA-C                             | rs114529772 | 0.0309  |
| Chr6:31251954 | HLA-C region | A/G | HLA-C                             | rs115182712 | 0.0488  |
| Chr6:31251962 | HLA-C region | C/T | HLA-C                             | rs114020623 | 0.0485  |
| Chr6:31252019 | HLA-C region | G/C | HLA-C                             | rs113629572 | 0.0472  |
| Chr6:31252026 | HLA-C region | A/C | HLA-C                             | rs114652772 | 0.0470  |
| Chr6:31252031 | HLA-C region | A/G | HLA-C                             | rs115699806 | 0.0488  |
| Chr6:31252033 | HLA-C region | C/T | HLA-C                             | rs114108198 | 0.0162  |
| Chr6:31252044 | HLA-C region | T/C | HLA-C                             | rs749596247 | 0.0002  |
| Chr6:31252075 | HLA-C region | C/A | HLA-C                             | rs73728774  | 0.0625  |
| Chr6:31252747 | HLA-C region | T/C | <b>HLA-C_v1 intergenic region</b> | rs9348862   | 0.0859  |
| Chr6:31252882 | HLA-C region | C/T | <b>HLA-C_v2 intergenic region</b> | rs9368670   | 0.0841  |
| Chr6:31252893 | HLA-C region | G/C | HLA-C                             | rs1946117   | 0.0984  |
| Chr6:31252909 | HLA-C region | G/C | HLA-C                             | rs117116032 | 0.0057  |
| Chr6:31252925 | HLA-C region | C/T | HLA-Cw6_LD2                       | rs12191877  | 0.13253 |
| Chr6:31252951 | HLA-C region | G/T | HLA-C_v2                          | rs116350468 | 0.0357  |
| Chr6:31253034 | HLA-C region | T/G | HLA-C_v3                          | rs115727572 | 0.0357  |
| Chr6:31265940 | HLA-C region | C/T | HLA-C                             | rs17192519  | 0.3085  |
| Chr6:31265971 | HLA-C region | G/T | HLA-C                             | rs17198867  | 0.0796  |
| Chr6:31265989 | HLA-C region | G/A | HLA-C                             | rs17198874  | 0.3079  |
| Chr6:31265998 | HLA-C region | C/T | HLA-C                             | rs17198881  | 0.0679  |
| Chr6:31266006 | HLA-C region | A/G | HLA-C                             | rs78514002  | 0.0136  |
| Chr6:31266015 | HLA-C region | A/G | HLA-C                             | rs17198888  | 0.1773  |
| Chr6:31266033 | HLA-C region | G/A | HLA-C                             | rs17198895  | 0.3056  |
| Chr6:31266041 | HLA-C region | T/C | HLA-C                             | rs17192526  | 0.4381  |
| Chr6:31266085 | HLA-C region | C/G | HLA-C_v4                          | rs17192533  | 0.1028  |

|               |              |                                  |                    |             |        |
|---------------|--------------|----------------------------------|--------------------|-------------|--------|
| Chr6:31266090 | HLA-C region | G/A                              | <b>HLA-Cw6_LD3</b> | rs4406273   | 0.0775 |
| Chr6:31266106 | HLA-C region | C/T                              | HLA-C              | rs115533686 | 0.0154 |
| Chr6:31266117 | HLA-C region | A/C                              | HLA-C_v5           | rs2524095   | 0.5689 |
| Chr6:31266151 | HLA-C region | G/T                              | HLA-C_v6           | rs7761855   | 0.0633 |
| Chr6:31266189 | HLA-C region | A/T                              | HLA-C              | rs17198909  | 0.0487 |
| Chr6:31266189 | HLA-C region | AA/TG                            | HLA-C              | rs386698993 | MNV    |
| Chr6:31266190 | HLA-C region | A/G                              | HLA-C_v7           | rs2853922   | 0.6029 |
| Chr6:31266207 | HLA-C region | CA/TG                            | HLA-C_v8           | rs386698994 | MNV    |
| Chr6:31274380 | HLA-C region | T/C                              | <b>HLA-Cw6_LD4</b> | rs9264942   | 0.3654 |
| Chr6:31274441 | HLA-C region | G/A                              | HLA-C              | rs9468942   | 0.0162 |
| Chr6:31274449 | HLA-C region | C/A                              | HLA-C_v9           | rs35647108  | 0.0671 |
| Chr6:31274513 | HLA-C region | A/G                              | HLA-C_v10          | rs6931873   | 0.2109 |
| Chr6:31274518 | HLA-C region | T/TCGGGGAG-<br>TCCAG-<br>CAGGTCC | HLA-C_v11          | rs28383849  | INS    |
| Chr6:31274520 | HLA-C region | C/CGGGAG-<br>TCCAG-<br>CAGGTCCCC | HLA-C              | rs370331751 | INS    |
| Chr6:31274521 | HLA-C region | G/A                              | HLA-C              | rs9264943   | 0.1126 |
| Chr6:31274555 | HLA-C region | C/T                              | <b>HLA-Cw6_LD5</b> | rs10484554  | 0.1442 |
| Chr6:31274580 | HLA-C region | C/G                              | HLA-C_v12          | rs184149624 | 0.0217 |
| Chr6:31274582 | HLA-C region | A/G                              | HLA-C_v13          | rs9348865   | 0.3769 |
| Chr6:31274584 | HLA-C region | AA/A                             | HLA-C_v14          | rs147538049 | 0.0439 |
| Chr6:31274586 | HLA-C region | A/G                              | HLA-C_v15          | rs9348865   | 0.3769 |
| Chr6:31274619 | HLA-C region | A/G                              | HLA-C_v16          | rs9264944   | 0.2350 |
| Chr6:31274627 | HLA-C region | G/A                              | HLA-C              | rs9264945   | 0.0423 |
| Chr6:31274630 | HLA-C region | G/A                              | HLA-C              | rs118169956 | 0.0156 |
| Chr6:31274634 | HLA-C region | T/C                              | HLA-C_v17          | rs9264946   | 0.2053 |
| Chr6:31274647 | HLA-C region | G/A                              | HLA-C              | rs9264947   | 0.1084 |
| Chr6:31274661 | HLA-C region | T/C                              | HLA-C              | rs3132481   | 0.1025 |
| Chr6:31274666 | HLA-C region | C/T                              | HLA-C              | rs76703505  | 0.0875 |
| Chr6:31274677 | HLA-C region | T/G                              | HLA-C              | rs3132480   | 0.1020 |
| Chr6:31274693 | HLA-C region | G/A                              | HLA-C              | rs3094691   | 0.4678 |
| Chr6:31324742 | HLA-B        | T/C                              | HLA-B_v1           | rs147324178 | 0.0000 |
| Chr6:31324742 | HLA-B        | TG/CC                            | HLA-B_v2           | rs796503852 | MNV    |
| Chr6:31324756 | HLA-B        | G/A                              | HLA-B_v3           | rs41552714  | 0.0449 |
| Chr6:31324788 | HLA-B        | T/C                              | HLA-B_v4           | rs9266193   | 0.3105 |
| Chr6:31324788 | HLA-B        | TCA/CCG                          | HLA-B_v5           | rs796610180 | MNV    |
| Chr6:31324790 | HLA-B        | A/G                              | HLA-B_v6           | rs9266194   | 0.0000 |
| Chr6:31324819 | HLA-B        | C/T                              | HLA-B_v7           | rs41557213  | 0.0149 |
| Chr6:31324829 | HLA-B        | GG/CA                            | HLA-B_v8           | rs9266196   | 0.0118 |
| Chr6:31324938 | HLA-B        | C/T                              | HLA-B_v9           | rs114811870 | 0.0502 |
| Chr6:31324953 | HLA-B        | C/T                              | HLA-B_v10          | rs9266207   | 0.0000 |
| Chr6:31324953 | HLA-B        | CTC/TTT                          | HLA-B_v11          | rs386699132 | MNV    |
| Chr6:31324996 | HLA-B        | G/C                              | HLA-B_v12          | rs2596490   | 0.4462 |
| Chr6:31325001 | HLA-B        | G/A                              | HLA-B_v13          | rs151341073 | 0.0004 |
| Chr6:31325004 | HLA-B        | G/A                              | HLA-B_v14          | rs9266209   | 0.4120 |
| Chr6:31325023 | HLA-B        | T/C                              | HLA-B_v15          | rs9266210   | 0.2541 |
| Chr6:31325023 | HLA-B        | TATCCAAT/CA<br>CCCCGAC           | HLA-B_v16          | rs796100503 | MNV    |
| Chr6:31325025 | HLA-B        | T/C                              | HLA-B_v17          | rs9266211   | 0.4631 |
| Chr6:31325028 | HLA-B        | A/G                              | HLA-B_v18          | rs2596489   | 0.1857 |
| Chr6:31325028 | HLA-B        | AAT/GAC                          | HLA-B_v19          | rs796742686 | MNV    |
| Chr6:31325030 | HLA-B        | T/C                              | HLA-B_v20          | rs2596488   | 0.1554 |
| Chr6:31325049 | HLA-B        | G/A                              | HLA-B_v21          | rs9266214   | 0.0209 |
| Chr6:31325056 | HLA-B        | C/T                              | HLA-B_v22          | rs2596487   | 0.1829 |

|               |                |     |                    |             |        |
|---------------|----------------|-----|--------------------|-------------|--------|
| Chr6:31344471 | FGFR3P1 region | C/G | FGFR3P1 region_v4  | rs3997983   | 0.3476 |
| Chr6:31344484 | FGFR3P1 region | C/T | FGFR3P1 region_v5  | rs114654060 | 0.0217 |
| Chr6:31344490 | FGFR3P1 region | G/A | FGFR3P1 region_v6  | rs3957111   | 0.1235 |
| Chr6:31344511 | FGFR3P1 region | G/T | FGFR3P1 region_v1  | rs28366075  | 0.0897 |
| Chr6:31344571 | FGFR3P1 region | T/G | FGFR3P1 region_v2  | rs28366076  | 0.0877 |
| Chr6:31344583 | FGFR3P1 region | A/G | FGFR3P1 region_v3  | rs13202464  | 0.0696 |
| Chr6:31344614 | FGFR3P1 region | C/T | FGFR3P1 region_v7  | rs138591337 | 0.0055 |
| Chr6:31344626 | FGFR3P1 region | G/C | FGFR3P1 region_v8  | rs9266596   | 0.2264 |
| Chr6:31344657 | FGFR3P1 region | C/A | FGFR3P1 region_v9  | rs2844546   | 0.2931 |
| Chr6:31344670 | FGFR3P1 region | C/T | FGFR3P1 region_v10 | rs2523637   | 0.3456 |
| Chr6:31344778 | FGFR3P1 region | C/G | FGFR3P1 region_v11 | rs143610460 | 0.0001 |
| Chr6:31361897 | MICA region    | A/C | MICA region_v2     | rs2523473   | 0.3505 |
| Chr6:31361974 | MICA region    | T/C | MICA region_v3     | rs34821683  | 0.2279 |
| Chr6:31361987 | MICA region    | C/T | MICA region_v4     | rs35026345  | 0.3019 |
| Chr6:31362010 | MICA region    | G/A | MICA region_v5     | rs34464243  | 0.2723 |
| Chr6:31362069 | MICA region    | T/G | MICA region_v6     | rs67284927  | 0.1341 |
| Chr6:31362120 | MICA region    | G/A | MICAregion_v1      | rs66609536  | 0.2539 |
| Chr6:31362159 | MICA           | C/T | MICA_v4            | rs2428476   | 0.0879 |
| Chr6:31362166 | MICA           | C/T | MICA_v5            | rs28366116  | 0.0879 |
| Chr6:31362179 | MICA           | G/A | MICA_v6            | rs1052414   | 0.1787 |
| Chr6:31362181 | MICA           | T/C | MICA_v7            | rs1052413   | 0.1382 |
| Chr6:31362207 | MICA           | T/C | MICA_v8            | rs1052409   | 0.2169 |
| Chr6:31362214 | MICA           | G/A | MICA_v9            | rs148280868 | 0.0219 |
| Chr6:31376928 | MICA           | T/C | <b>MICA_v1</b>     | rs2523497   | 0.4312 |
| Chr6:31376989 | MICA           | A/G | MICA_v10           | rs12660741  | 0.0275 |
| Chr6:31377047 | MICA           | C/T | MICA_v2            | rs6910087   | 0.1305 |
| Chr6:31377086 | MICA           | C/G | MICA_v3            | rs528265306 | 0.0070 |
| Chr6:31377100 | MICA           | A/G | MICA_11            | rs3032981   | 0.1684 |
| Chr6:31431636 | HCP5           | T/A | HCP5_v4            | rs143344109 | 0.0013 |
| Chr6:31431666 | HCP5           | G/T | HCP5_v5            | rs749856170 | 0.0001 |
| Chr6:31431691 | HCP5           | G/T | HCP5_v6            | rs2255221   | 0.0818 |
| Chr6:31431723 | HCP5           | G/A | HCP5_v7            | rs2255223   | 0.0415 |
| Chr6:31431757 | HCP5           | A/G | HCP5_v8            | rs11752262  | 0.0714 |
| Chr6:31431780 | HCP5           | T/G | HCP5_v1            | rs2395029   | 0.0359 |
| Chr6:31431813 | HCP5           | A/G | HCP5_v9            | rs3130907   | 0.1051 |
| Chr6:31431820 | HCP5           | C/T | HCP5_v2            | rs2243621   | 0.1611 |
| Chr6:31431874 | HCP5           | G/T | HCP5_v3            | rs2395030   | 0.0474 |
| Chr6:31431911 | HCP5           | A/G | HCP5_v10           | rs78490730  | 0.0017 |
| Chr6:31461372 | MICB-DT        | A/T | MICB-DT_v1         | rs2507971   | 0.6052 |
| Chr6:31461442 | MICB-DT        | T/C | MICB-DT_v3         | rs372175088 | 0.0005 |
| Chr6:31461492 | MICB-DT        | G/C | MICB-DT_v2         | rs9267325   | 0.1409 |
| Chr6:31461509 | MICB-DT        | G/T | MICB-DT_v4         | rs2516413   | 0.2891 |
| Chr6:31461558 | MICB-DT        | T/C | MICB-DT_v5         | rs3094006   | 0.2653 |
| Chr6:31461608 | MICB-DT        | C/T | MICB-DT_v6         | rs2534687   | 0.3360 |
| Chr6:31461613 | MICB-DT        | T/C | MICB-DT_v7         | rs2252937   | 0.0698 |

| <b>Skin barrier function</b> |                           |                |                   |                 |            |
|------------------------------|---------------------------|----------------|-------------------|-----------------|------------|
| <b>Genome position</b>       | <b>Gene</b>               | <b>REF/ALT</b> | <b>SNP name</b>   | <b>dbSNP ID</b> | <b>MAF</b> |
| Chr1:152549876               | LCE region                | C/T            | LCE_v             | rs16834215      | 0.0096     |
| Chr1:152550018               | LCE region                | T/G            | LCE_v1            | rs4085613       | 0.6370     |
| Chr1:152550103               | LCE region                | T/A,C          | LCE_v             | rs56038709      | 0.0000     |
| Chr1:152551276               | LCE3B region              | A/G            | LCE3B             | rs4112788       | 0.6369     |
| chr1:152551325               | LCE3B region              | C/T            | LCE3B_v2          | rs4112787       | 0.3505     |
| chr1:152551547               | LCE3D region              | A/G            | LCE3D             | rs61813877      | 0.3435     |
| Chr1:152590187               | LCE region                | C/T            | LCE_v2            | rs6677595       | 0.6361     |
| Chr1:152590352               | LCE3A-B intergenic region | G/A            | LCE3A-B_v3        | rs149178120     | 0.0036     |
| Chr1:152590444               | LCE3A-B intergenic region | G/A            | LCE3A-B_v4        | rs6701307       | 0.3916     |
| Chr1:152590886               | LCE3A-B intergenic region | T/C            | LCE3A-B_v5        | rs4845447       | 0.3921     |
| Chr1:152590890               | LCE3A-B intergenic region | G/A            | <b>LCE3A-B_v2</b> | rs6701730       | 0.2454     |
| Chr1:152590933               | LCE3A-B intergenic region | G/A            | LCE3A-B_v6        | rs772160083     | 0.0003     |
| Chr1:152590943               | LCE3A-B intergenic region | T/C            | LCE3A-B_v7        | rs4845448       | 0.3244     |
| Chr1:152590955               | LCE3A-B intergenic region | T/C            | LCE3A-B_v8        | rs73019274      | 0.0068     |
| Chr1:152591024               | LCE3A-B intergenic region | T/A            | LCE3A-B_v9        | rs4845449       | 0.3925     |
| Chr1:152591142               | LCE region                | A/C            | LCE_v3            | rs1886734       | 0.6369     |
| Chr1:152591200               | LCE3A-B intergenic region | T/C            | LCE3A-B_v10       | rs4845450       | 0.3881     |
| Chr1:152591953               | LCE3A-B intergenic region | G/C            | LCE3A-B_v11       | rs4845453       | 0.4916     |
| Chr1:152591964               | LCE3A-B intergenic region | A/G            | LCE3A-B_v12       | rs112857972     | 0.0136     |
| Chr1:152592184               | LCE region                | C/T            | LCE_v4            | rs4845454       | 0.6376     |
| Chr1:152593292               | LCE3A-B intergenic region | G/A            | <b>LCE3A-B_v1</b> | rs12030223      | 0.2539     |
| Chr1:152593307               | LCE3A-B intergenic region | G/A            | LCE3A-B_v13       | rs6662989       | 0.3599     |
| Chr1:152593437               | LCE3A-B intergenic region | T/C            | LCE3A-B_v14       | rs11205044      | 0.3931     |
| Chr1:152593440               | LCE3A-B intergenic region | A/G            | LCE3A-B_v15       | rs59980392      | 0.0053     |
| Chr1:152593444               | LCE3A-B intergenic region | T/C            | LCE3A-B_v16       | rs12027820      | 0.2643     |
| Chr1:152593549               | LCE region                | C/T            | LCE_v5            | rs10888503      | 0.6442     |
| Chr1:152593551               | LCE3A-B intergenic region | T/C            | LCE3A-B_v17       | rs186644005     | 0.0112     |
| Chr1:152778443               | LCE1C                     | G/T            | LCE1C_v2          | rs12025125      | 0.1371     |
| Chr1:152778526               | LCE1C                     | C/T            | LCE1C             | rs6701216       | 0.1467     |
| Chr1:152778558               | LCE1C                     | C/T            | LCE1C_v3          | rs6701221       | 0.1515     |
| Chr1:152778576               | LCE1C                     | G/A            | LCE1C_v4          | rs4845488       | 0.4681     |
| Chr1:152778584               | LCE1C                     | C/T            | LCE1C_v5          | rs192573057     | 0.0095     |
| Chr6:31084034                | CDSN                      | C/T            | CDSN_v8           | rs117951780     | 0.0107     |
| Chr6:31084048                | CDSN                      | A/G            | CDSN_v9           | rs3094216       | 0.2195     |
| Chr6:31084075                | CDSN                      | G/C            | CDSN_v10          | rs3130982       | 0.4899     |
| Chr6:31084147                | CDSN                      | G/T            | CDSN_v11          | rs369037215     | 0.0001     |
| Chr6:31084163                | CDSN                      | A/G            | CDSN_v1           | rs3132554       | 0.5235     |
| Chr6:31084170                | CDSN                      | A/C            | <b>CDSN_v2</b>    | rs1042127       | 0.1935     |
| Chr6:31084191                | CDSN                      | T/C            | CDSN_v3           | rs33941312      | 0.0249     |
| Chr6:31084288                | CDSN                      | T/C            | CDSN_v4           | rs1042126       | 0.5185     |
| Chr6:31084333                | CDSN                      | G/A            | CDSN_v12          | rs36097319      | 0.0017     |
| Chr6:31084627                | CDSN                      | C/T            | CDSN_v13          | rs150163828     | 0.0004     |

|                |               |       |                  |             |        |
|----------------|---------------|-------|------------------|-------------|--------|
| Chr6:31084639  | CDSN          | C/T   | <b>CDSN_v5</b>   | rs4713436   | 0.1821 |
| Chr6:31084684  | CDSN          | G/A   | CDSN_v14         | rs3094215   | 0.4700 |
| Chr6:31084714  | CDSN          | G/A   | CDSN_v15         | rs145637055 | 0.0012 |
| Chr6:31084723  | CDSN          | G/A   | CDSN_v16         | rs117764398 | 0.0004 |
| Chr6:31084787  | CDSN          | A/G   | CDSN_v6          | rs707913    | 0.2139 |
| Chr6:31084792  | CDSN          | C/T   | CDSN_v7          | rs3130983   | 0.5186 |
| Chr6:31110119  | CCHCR1 region | A/G   | CCHCR1_v8        | rs183837992 | 0.0019 |
| Chr6:31110229  | CCHCR1        | G/A   | CCHCR1_v9        | rs116109529 | 0.0058 |
| Chr6:31110391  | CCHCR1        | G/C   | CCHCR1_v1        | rs1576      | 0.3461 |
| Chr6:31112737  | CCHCR1        | C/A   | CCHCR1_v2        | rs130079    | 0.2491 |
| Chr6:31112823  | CCHCR1        | T/C   | CCHCR1_v10       | rs2073720   | 0.0094 |
| Chr6:31112899  | CCHCR1        | C/T   | CCHCR1_v11       | rs3094226   | 0.2305 |
| Chr6:31112925  | CCHCR1        | C/T   | <b>CCHCR1_v3</b> | rs2073719   | 0.2393 |
| Chr6:31114182  | CCHCR1        | A/G   | CCHCR1_v4        | rs746647    | 0.3220 |
| Chr6:31114335  | CCHCR1        | A/G   | CCHCR1_v12       | rs2240066   | 0.0434 |
| Chr6:31114358  | CCHCR1        | T/G   | CCHCR1_v13       | rs369540929 | 0.0019 |
| Chr6:31114448  | CCHCR1        | CC/TT | CCHCR1_v5        | rs375143475 | none   |
| Chr6:31114449  | CCHCR1        | C/T   | CCHCR1_v14       | rs2240065   | 0.1921 |
| Chr6:31122315  | CCHCR1        | G/C   | CCHCR1_v15       | rs130066    | 0.4133 |
| Chr6:31122330  | CCHCR1        | G/A   | CCHCR1_v16       | rs130077    | 0.1519 |
| Chr6:31122393  | CCHCR1        | G/A   | CCHCR1_v17       | rs753814781 | 0.0000 |
| Chr6:31122472  | CCHCR1        | C/T   | CCHCR1_v18       | rs576214578 | 0.0001 |
| Chr6:31122482  | CCHCR1        | G/A   | CCHCR1_v6        | rs130076    | 0.2185 |
| Chr6:31122500  | CCHCR1        | G/A   | CCHCR1_v7        | rs130065    | 0.2083 |
| Chr6:31122502  | CCHCR1        | C/T   | CCHCR1_v19       | rs130075    | 0.0527 |
| Chr6:31122521  | CCHCR1        | G/A   | CCHCR1_v20       | rs530074163 | 0.0000 |
| Chr6:31122551  | CCHCR1        | C/T   | CCHCR1_v21       | rs146335956 | 0.0008 |
| Chr6:31122564  | CCHCR1        | C/G   | CCHCR1_v22       | rs144885162 | 0.0179 |
| Chr9:110816795 | KLF4 region   | T/C   | KLF4_v2          | rs1369190   | 0.3718 |
| Chr9:110817020 | KLF4 region   | A/G   | KLF4             | rs10979182  | 0.4154 |

| <b>Innate immunity</b> |                |                |                 |                 |            |
|------------------------|----------------|----------------|-----------------|-----------------|------------|
| <b>Genome position</b> | <b>Gene</b>    | <b>REF/ALT</b> | <b>SNP name</b> | <b>dbSNP ID</b> | <b>MAF</b> |
| Chr2:113736206         | IL36G          | C/T            | IL36G_v4        | rs756860964     | 0.0000     |
| Chr2:113736280         | IL36G          | A/G            | IL36G_v5        | rs758024889     | none       |
| Chr2:113736296         | IL36G          | G/T            | IL36G_v1        | rs28947206      | 0.0002     |
| Chr2:113736325         | IL36G          | C/T            | IL36G_v2        | rs28947207      | 0.0002     |
| Chr2:113739437         | IL36G          | T/C            | IL36G_v6        | rs187067341     | 0.0007     |
| Chr2:113739532         | IL36G          | G/A            | IL36G_v7        | rs6743744       | 0.0639     |
| Chr2:113739563         | IL36G          | T/C            | IL36G_v3        | rs28947211      | 0.0003     |
| Chr2:113739597         | IL36G          | T/A            | IL36G_v8        | rs139031255     | 0.0012     |
| Chr2:163123826         | IFIH1          | C/A            | IFIH1_v2        | rs74162090      | 0.0001     |
| Chr2:163123842         | IFIH1          | G/A            | IFIH1_v3        | rs74162089      | 0.0019     |
| Chr2:163124051         | IFIH1          | C/T            | IFIH1           | rs1990760       | 0.6002     |
| Chr6:31540071          | LTA            | G/A            | LTA_v1          | rs1800683       | 0.3257     |
| Chr6:31540141          | LTA            | AG/CG          | LTA_v4          | rs2239704       | 0.4097     |
| Chr6:31540313          | LTA            | A/G            | LTA_v2          | rs909253        | 0.3326     |
| Chr6:31542308          | LTA region     | T/C            | LTA_v5          | rs1799964       | 0.2115     |
| Chr6:31542476          | LTA region     | C/A            | LTA_v6          | rs1800630       | 0.1526     |
| Chr6:31542482          | LTA region     | C/T            | LTA_v3          | rs1799724       | 0.1149     |
| Chr6:31542533          | LTA region     | C/T            | LTA_v7          | rs4248158       | 0.0153     |
| Chr8:7272329           | DEFB4B         | C/T            | DEFB4B_v3       | rs2737531       | 0.3956     |
| Chr8:7272356           | DEFB4B         | C/T            | DEFB4B_v4       | rs2737913       | 0.0593     |
| Chr8:7272439           | DEFB4B         | G/A            | DEFB4B_v1       | rs2740091       | 0.1781     |
| Chr8:7273050           | DEFB4B         | T/C            | DEFB4B_v2       | rs73661358      | 0.1517     |
| Chr9:32534685          | DDX58 region   | A/G            | DDX58_v3        | rs73644984      | 0.0083     |
| Chr9:32534714          | DDX58 region   | T/G            | DDX58_v1        | rs34085293      | 0.1410     |
| Chr9:32534851          | DDX58 region   | G/A            | DDX58_v2        | rs657454        | 0.6309     |
| Chr12:56737973         | STAT2          | A/G            | STAT2           | rs2066808       | 0.0671     |
| Chr19:10469975         | TYK2           | A/C            | TYK2_v1         | rs12720356      | 0.0883     |
| Chr19:10470085         | TYK2           | G/A            | TYK2_v5         | rs777784293     | 0.0002     |
| Chr19:10472933         | TYK2           | A/G            | TYK2_v2         | rs280519        | 0.5167     |
| Chr19:10473033         | TYK2           | C/T            | TYK2_v6         | rs758682935     | 0.0001     |
| Chr19:10473050         | TYK2           | C/T            | TYK2_v7         | rs142576987     | 0.0002     |
| Chr19:10473076         | TYK2           | G/A            | TYK2_v8         | rs774211784     | 0.0000     |
| Chr19:10475649         | TYK2           | C/T            | TYK2_v3         | rs2304255       | 0.0758     |
| Chr19:10475652         | TYK2           | C/A            | TYK2_v4         | rs2304256       | 0.2850     |
| Chr19:10475760         | TYK2           | G/A            | TYK2_v9         | rs12720270      | 0.1634     |
| Chr20:30045269         | DEFB123 region | G/A            | DEFB123_v2      | rs559204339     | 0.0003     |
| Chr20:30045393         | DEFB123 region | G/A            | DEFB123         | rs6088273       | 0.6282     |

---



---

**Cytokine-dependent pathways and T-cell signaling**


---

| Genome position | Gene          | REF/ALT                                   | SNP name     | dbSNP ID    | MAF    |
|-----------------|---------------|-------------------------------------------|--------------|-------------|--------|
| Chr1:12252892   | TNFRSF1B      | C/T                                       | TNFRSF1B_v4  | rs1768642   | 0.2244 |
| Chr1:12252955   | TNFRSF1B      | T/G                                       | TNFRSF1B_v1  | rs1061622   | 0.2367 |
| Chr1:12253062   | TNFRSF1B      | G/A                                       | TNFRSF1B_v5  | rs5746026   | 0.0314 |
| Chr1:12267099   | TNFRSF1B      | C/T                                       | TNFRSF1B_v6  | rs150675043 | 0.0005 |
| Chr1:12267102   | TNFRSF1B      | A/G                                       | TNFRSF1B_v7  | rs371676482 | 0.0005 |
| Chr1:12267265   | TNFRSF1B      | A/G                                       | TNFRSF1B_v2  | rs1061624   | 0.5554 |
| Chr1:12267270   | TNFRSF1B      | T/G                                       | TNFRSF1B_v8  | rs5030792   | 0.0410 |
| Chr1:12267292   | TNFRSF1B      | C/T                                       | TNFRSF1B_v3  | rs3397      | 0.6393 |
| Chr1:25292799   | RUNX3 region  | C/T                                       | RUNX3_v2     | rs554614108 | 0.0016 |
| Chr1:25292896   | RUNX3 region  | A/G                                       | RUNX3_v3     | rs767088722 | 0.0001 |
| Chr1:25293084   | RUNX3 region  | T/C                                       | RUNX3        | rs7536201   | 0.5437 |
| Chr1:67600686   | IL23R region  | G/T                                       | IL23R_v1     | rs12044149  | 0.2526 |
| Chr1:67611613   | IL23R         | G/A                                       | IL23R_v2     | rs4655683   | 0.3397 |
| Chr1:67658723   | IL23R         | T/C                                       | IL23R_v8     | rs12567033  | 0.0001 |
| Chr1:67658769   | IL23R         | C/T                                       | IL23R_v9     | rs12562213  | 0.0273 |
| Chr1:67658803   | IL23R         | G/A                                       | IL23R_v3     | rs72676067  | 0.2915 |
| Chr1:67658954   | IL23R         | T/C                                       | IL23R_v10    | rs72676069  | 0.3016 |
| Chr1:67670133   | IL23R         | T/G                                       | IL23R_v11    | rs1004820   | 0.3989 |
| Chr1:67670213   | IL23R         | G/A                                       | IL23R_v4     | rs1004819   | 0.2987 |
| Chr1:67694010   | IL23R         | G/A                                       | IL23R_v12    | rs374068944 | 0.0001 |
| Chr1:67694202   | IL23R         | A/G                                       | IL23R_v5     | rs2201841   | 0.3059 |
| Chr1:67705900   | IL23R         | G/A                                       | IL23R_v6     | rs41313262  | 0.0160 |
| Chr1:67705958   | IL23R         | G/A                                       | IL23R_v7     | rs11209026  | 0.0656 |
| Chr2:204738725  | CTLA4         | C/T                                       | CTLA4_v1     | rs231721    | 0.0083 |
| Chr2:204738919  | CTLA4         | G/A                                       | CTLA4_v2     | rs3087243   | 0.4366 |
| Chr2:204738938  | CTLA4 region  | G/A                                       | CTLA4 region | rs11571319  | 0.1652 |
| Chr3:101575779  | NFKBIZ        | G/A                                       | NFKBIZ       | rs537411494 | 0.0020 |
| Chr3:101575882  | NFKBIZ        | T/C                                       | NFKBIZ       | rs595788    | 0.2838 |
| Chr3:101575902  | NFKBIZ        | C/T                                       | NFKBIZ       | rs7628891   | 0.0281 |
| Chr3:101576029  | NFKBIZ        | T/TACTTTTA-<br>GAAA-<br>GCTTTAA-<br>TAACC | NFKBIZ_v1    | rs3217713   | 0.7714 |
| Chr3:101615580  | NFKBIZ region | C/G                                       | NFKBIZ_v4    | rs534286886 | 0.0001 |
| Chr3:101615625  | NFKBIZ region | T/C                                       | NFKBIZ_v5    | rs9818678   | 0.4951 |
| Chr3:101615801  | NFKBIZ region | A/G                                       | NFKBIZ_v6    | rs114576100 | 0.0107 |
| Chr3:101615826  | NFKBIZ region | G/T                                       | NFKBIZ_v2    | rs4683946   | 0.1998 |
| Chr3:101663317  | NFKBIZ region | A/G                                       | NFKBIZ_v7    | rs9881690   | 0.3677 |
| Chr3:101663323  | NFKBIZ region | A/G                                       | NFKBIZ_v8    | rs77371624  | 0.0215 |
| Chr3:101663386  | NFKBIZ region | C/T                                       | NFKBIZ_v9    | rs7625614   | 0.4198 |
| Chr3:101663555  | NFKBIZ region | A/G                                       | NFKBIZ_v3    | rs7637230   | 0.2087 |
| Chr3:124811314  | SLC12A8       | G/A                                       | SLC12A8      | rs651630    | 0.4786 |
| Chr5:150466997  | TNIP1         | C/T                                       | TNIP1_v3     | rs557528520 | 0.0019 |
| Chr5:150467130  | TNIP1         | T/G                                       | TNIP1_v4     | rs140378407 | 0.0049 |
| Chr5:150467170  | TNIP1         | T/C                                       | TNIP1_v5     | rs2233279   | 0.4209 |
| Chr5:150467189  | TNIP1         | G/C                                       | TNIP1_v1     | rs2233278   | 0.0507 |
| Chr5:150476004  | TNIP1 region  | T/C                                       | TNIP1_v2     | rs1024995   | 0.1124 |
| Chr5:150476129  | TNIP1 region  | C/T                                       | TNIP1_v6     | rs11738559  | 0.1709 |
| Chr5:150476200  | TNIP1 region  | T/A                                       | TNIP1_v7     | rs770810925 | 0.0000 |
| Chr5:158742785  | IL12B         | A/G                                       | IL12B_v4     | rs542242777 | 0.0002 |
| Chr5:158742950  | IL12B         | T/G                                       | IL12B_v1     | rs3212227   | 0.2029 |
| Chr5:158750544  | IL12B         | G/A                                       | IL12B_v5     | rs140257668 | 0.0053 |
| Chr5:158750761  | IL12B         | G/A                                       | IL12B_v6     | rs183593461 | 0.0016 |



|                |                      |         |                |             |        |
|----------------|----------------------|---------|----------------|-------------|--------|
| Chr5:158750769 | IL12B                | C/T     | IL12B_v2       | rs3213094   | 0.2048 |
| Chr5:158759900 | IL12B region         | A/G     | IL12B_v3       | rs2546890   | 0.4861 |
| Chr5:158759915 | IL12B region         | G/A     | IL12B_v7       | rs559446512 | 0.0000 |
| Chr5:159912418 | MIR146A              | C/G     | MIR146A        | rs2910164   | 0.7600 |
| Chr6:31542963  | TNF- $\alpha$ region | G/A     | TNFA           | rs1800750   | 0.0157 |
| Chr6:31543031  | TNF- $\alpha$ region | G/A     | TNFA_v1        | rs1800629   | 0.1624 |
| Chr6:31543101  | TNF- $\alpha$ region | G/A     | TNFA_v2        | rs361525    | 0.0529 |
| Chr6:31543581  | TNF- $\alpha$        | AG/A    | TNFA           | rs766034823 | 0.0000 |
| Chr6:31543758  | TNF- $\alpha$        | G/A     | TNFA           | rs3093661   | 0.0319 |
| Chr6:31543825  | TNF- $\alpha$        | A/T     | TNFA           | rs4645839   | 0.0031 |
| Chr6:31543827  | TNF- $\alpha$        | G/A     | <b>TNFA_v3</b> | rs1800610   | 0.0869 |
| Chr6:31544189  | TNF- $\alpha$        | A/G     | TNFA           | rs3093662   | 0.0779 |
| Chr6:31543943  | TNF- $\alpha$        | G/GTGAA | TNFA_v4        | rs374501689 | DEL    |
| Chr6:32814820  | TAP1                 | G/T     | TAP1_v1        | rs55865470  | 0.0295 |
| Chr6:32814902  | TAP1                 | C/T     | TAP1_v2        | rs41551515  | 0.0294 |
| Chr6:32814942  | TAP1                 | C/T     | TAP1_v3        | rs1057149   | 0.0335 |
| Chr6:32814975  | TAP1                 | T/C     | TAP1_v4        | rs1135216   | 0.1500 |
| Chr6:32815025  | TAP1                 | G/A     | TAP1_v5        | rs111511638 | 0.0487 |
| Chr6:52101739  | IL17F                | T/C     | IL17F_v1       | rs56499381  | 0.0473 |
| Chr6:52101758  | IL17F                | C/T     | IL17F_v2       | rs11465553  | 0.0407 |
| Chr6:52101768  | IL17F                | G/A     | IL17F_v4       | rs148267766 | 0.0001 |
| Chr6:52101844  | IL17F                | T/C     | IL17F_v3       | rs2397084   | 0.0942 |
| Chr6:111577673 | TRAF3IP2 region      | A/G     | TRAF3IP2_v5    | rs116561834 | 0.0031 |
| Chr6:111577761 | TRAF3IP2 region      | A/G     | TRAF3IP2_v1    | rs71562288  | 0.0917 |
| Chr6:111673714 | TRAF3IP2 region      | T/C     | TRAF3IP2_v2    | rs240993    | 0.7282 |
| Chr6:111673756 | REV3L                | C/T     | REV3L          | rs779554762 | 0.0004 |
| Chr6:111913070 | TRAF3IP2             | G/A     | TRAF3IP2_v6    | rs13190932  | 0.0579 |
| Chr6:111913262 | TRAF3IP2 region      | C/T     | TRAF3IP2_v3    | rs33980500  | 0.0786 |
| Chr6:111922503 | TRAF3IP2             | G/C     | TRAF3IP2_v7    | rs76228616  | 0.0406 |
| Chr6:111922720 | TRAF3IP2 region      | A/G     | TRAF3IP2_v4    | rs13210247  | 0.0662 |
| Chr6:138195991 | TNFAIP3              | A/G     | TNFAIP3_v4     | rs146534657 | 0.0014 |
| Chr6:138196066 | TNFAIP3              | T/G     | TNFAIP3_v1     | rs2230926   | 0.0348 |
| Chr6:138196151 | TNFAIP3              | G/A     | TNFAIP3_v5     | rs140424499 | 0.0006 |
| Chr6:138197824 | TNFAIP3              | C/T     | TNFAIP3_v2     | rs582757    | 0.7371 |
| Chr6:138199377 | TNFAIP3              | A/C     | TNFAIP3_v6     | rs564537694 | 0.0001 |
| Chr6:138199417 | TNFAIP3              | G/T     | TNFAIP3_v3     | rs610604    | 0.6745 |
| Chr9:117552885 | TNFSF15              | T/C     | TNFSF15_v1     | rs3810936   | 0.6912 |
| Chr9:117552954 | TNFSF15              | A/C     | TNFSF15_v5     | rs187538454 | 0.0000 |
| Chr9:117558703 | TNFSF15              | C/T     | TNFSF15_v2     | rs6478108   | 0.6693 |
| Chr9:117566440 | TNFSF15              | A/G     | TNFSF15_v3     | rs4263839   | 0.6850 |
| Chr9:117568766 | TNFSF15 region       | A/G     | TNFSF15_v4     | rs6478109   | 0.6794 |
| Chr12:6450845  | TNFRSF1A             | C/T     | TNFRSF1A_v2    | rs151344626 | 0.0011 |
| Chr12:6450871  | TNFRSF1A             | C/T     | TNFRSF1A_v3    | rs75304026  | 0.0001 |
| Chr12:6450945  | TNFRSF1A             | T/C     | TNFRSF1A       | rs767455    | 0.4326 |
| Chr16:11365500 | SOCS1 region         | C/T     | SOCS1          | rs367569    | 0.2777 |
| Chr16:11365416 | SOCS1 region         | G/A     | SOCS1_v2       | rs431918    | 0.1712 |
| Chr16:30942521 | FBXL19               | T/A     | FBXL19_v1      | rs79714718  | 0.0032 |
| Chr16:30942595 | FBXL19               | C/T     | FBXL19_v2      | rs145623212 | 0.0007 |
| Chr16:30942625 | FBXL19               | G/A     | FBXL19_v3      | rs10782001  | 0.3643 |
| Chr17:26106675 | NOS2                 | A/G     | NOS2_v1        | rs4795067   | 0.3519 |
| Chr17:26124699 | NOS2                 | T/C     | NOS2_v3        | rs16949     | 0.2221 |
| Chr17:26124908 | NOS2                 | G/A     | NOS2_v2        | rs28998802  | 0.1520 |
| Chr17:78157811 | CARD14               | T/G     | CARD14         | rs146214639 | 0.0023 |
| Chr21:36470865 | RUNX1 region         | C/T     | RUNX1          | rs8128234   | 0.2114 |

|                |               |     |           |            |        |
|----------------|---------------|-----|-----------|------------|--------|
| Chr21:36470574 | RUNX1 region  | T/C | RUNX1_v2  | rs2834760  | 0.2097 |
| Chr22:17565035 | IL17RA region | G/A | IL17RA    | rs4819554  | 0.8084 |
| Chr22:17564736 | IL17RA region | A/G | IL17RA_v2 | rs41524752 | 0.0088 |
| Chr22:17564907 | IL17RA region | G/A | IL17RA_v3 | rs4819553  | 0.1882 |
| Chr22:17565013 | IL17RA region | A/G | IL17RA_v4 | rs4819958  | 0.1957 |

The SNP panel was composed of  $n = 417$  SNPs located in psoriasis-risk genes. SNP-carrying genes were classified accordingly to their functions (antigen presentation, skin barrier, innate immune responses and cytokine-dependent signalling).

Notes: Genome position on Chromosome (Chr), UCSC Genome Browser hg19 assembly; Gene name; REF/ALT, reference base / alteration base; SNP, single-nucleotide polymorphism; dbSNP ID, data base SNP identification number at NCBI; MAF, minor allele frequency from dbGaP in European population; rs, reference SNP ID number; ERAP1, endoplasmic reticulum aminopeptidase 1; PSORS1C3, Psoriasis Susceptibility 1 Candidate 3; HLA, Human Leukocyte Antigen; FGFR3P1, fibroblast growth factor receptor 3 pseudogene 1; MICA, MHC class I polypeptide-related sequence A; HCP5, HLA complex P5; MICB-DT, MHC class I polypeptide-related sequence B- Divergent Transcription; LCE, late cornified envelope; CDSN, corneodesmosin; CCHCR1, coiled-coil alpha-helical rod protein 1; KLF4, Krüppel-Like Factor 4; IL, interleukin; IFIH1, Interferon Induced With Helicase C Domain 1; LTA, Lymphotoxin Alpha; DEFB, Defensin Beta; DDX58, DExD/H-Box Helicase 58; STAT2, signal transducer and activator of transcription 2; TYK2, tyrosine kinase 2; TNFRSF, Tumor necrosis factor receptor superfamily; RUNX, Runt-related transcription factor; Cytotoxic T-Lymphocyte Antigen 4, CTLA 4; NFKBIZ, NF-kB inhibitor zeta; Solute Carrier Family 12 Member 8, SLC12A8; TNIP1, TNFAIP3 Interacting Protein 1; MIR146A, MicroRNA 146a; protein reversionless 3-like, REV3L; TRAF3IP2, TRAF3 interacting protein 2; TNFAIP3, TNF alpha induced protein 3; TNFSF15, TNF superfamily member 15; SOCS1, suppressor of cytokine signaling 1; NOS2, Nitric Oxide Synthase 2; CARD14, Caspase Recruitment Domain Family Member 14; LD, linkage disequilibrium; MNV, Multi-nucleotide variants; INS, insertion. SNPs significantly associating with response to ustekinumab are indicated in font bold.

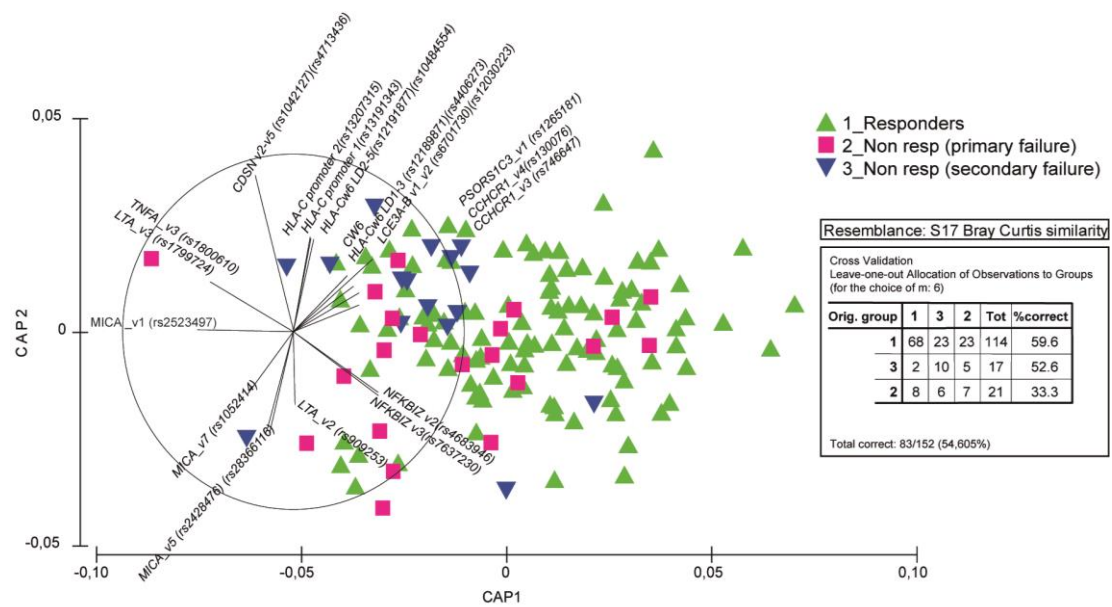

**Figure S1.** SNPs patterns in patient populations clustered based on their clinical response rate to ustekinumab. Analysis of SNP patterns by CAP performed on patient populations clustered based on their clinical response rate to ustekinumab: responders up to 2-year treatment (green triangles) (group 1, n=114), non-responders or only partially responders for primary failure (fuchsia squares) (group 2, n=21) or responders losing responsiveness over time for secondary failure (blue downward triangles) (group 3, n=17). The length of each vector line corresponds to the strength of the correlation and direction for each. Distinctness of the three patient groups was assessed using leave-one-out allocation success. 83 out of 152 (54,605%) patients were correctly allocated. Only the most relevant correlations were considered as valuable and included in the plot.

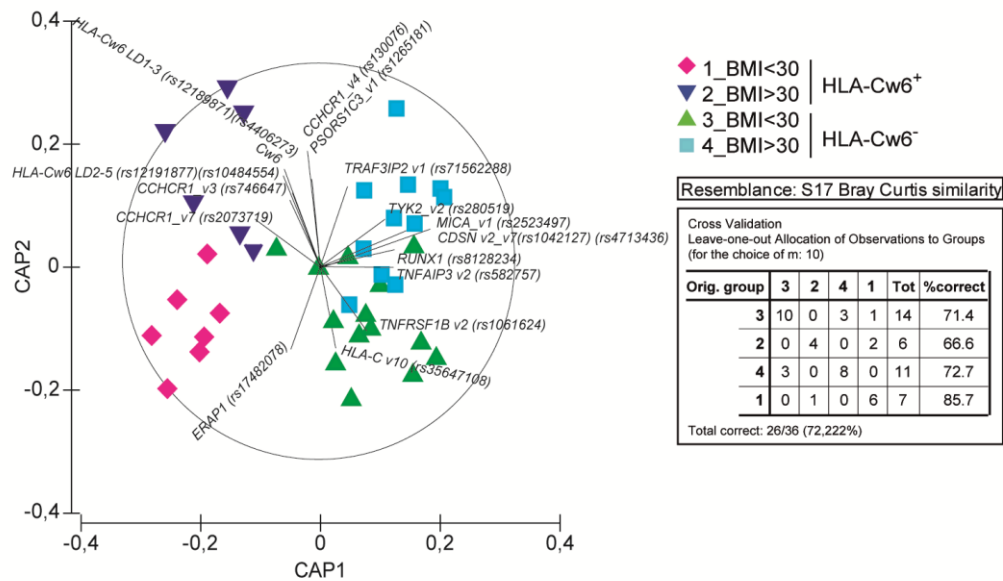

**Figure S2.** SNPs patterns in patient populations clustered based on BMI values and HLA-Cw6 allele presence/absence. SNP patterns were identified by CAP performed on non-responder patient populations (n=36 clustered based on BMI values and presence or absence of HLA-Cw6 allele). CAP ordination plot shows a significant clustering of psoriatic patients belonging to HLA-Cw6<sup>+</sup> and HLA-Cw6<sup>-</sup> groups along x-axis and to BMI <30 or >30 groups along y-axis. Four established subgroups are showed in the plot: 1\_HLA-Cw6<sup>+</sup> BMI <30 (fuchsia diamonds), 2\_HLA-Cw6<sup>+</sup> BMI >30 (blue downward triangles), 3\_HLA-Cw6<sup>-</sup> BMI <30 (green triangles) and 4\_HLA-Cw6<sup>-</sup> BMI >30 (light blue squares). 26 out of 36 (72,222%) patients were correctly allocated. Only the most relevant correlations were considered as valuable and included in the plot.
